# Supplementary material for: The effect of aerobic and high-intensity interval training on plasma pentraxin 3 and lipid parameters in overweight and obese women
Source: PeerJ. 2024 Sep 27;12:e18123. doi: 10.7717/peerj.18123 (PMC11451446; doi:10.7717/peerj.18123)
Supplement: Supplemental Information 1 [file peerj-12-18123-s001.xlsx]

## Sheet: DATA SPSS
group	age	height	weight_pre	weight_post	BMI_pre	BMI_post	fatmas_pre	fatmas_post	waist_pre	waist_post	hip_pre	hip_post	WHO_pre	WHO_post	VO2MAX_pre	VO2MAX_post	PTX3_pre	PTX3_post	HOMOIR_pre	HOMOIR_post	HSCRP_pre	HSCRP_post	GLUKOZ_pre	GLUKOZ_post	INSULİN_pre	INSULİN_post	LDL_pre	LDL_post	HDL_pre	HDL_post	TC_pre	TC_post	TG_pre	TG_post	Δweight	ΔBMI	Δfatmas	Δwaist	Δhip	ΔWHO	ΔVO2MAX	ΔPTX3	ΔHOMOIR	ΔHsCRP	ΔGlukoz	ΔInsülin	ΔLDLC	ΔHDLC	ΔTC
1	23	1.55	81.8	76.7	34.0479	31.9251	37.9	30.6	84	82	107	104	0.785047	0.788462	26.8	32.9	1.86	2	3.24	1.2	2	1.97	81	90	14.57	5.98	116	146	36.688	50	152	123	139	82	6.23472	6.23472	19.2612	2.38095	2.80374	-0.434982	-22.7612	-7.52688	62.963	1.5	-11.1111	58.9568	-25.8621	-36.2843	19.0789
1	37	1.55	73.2	71	30.4683	29.5525	32.9	30.7	90	88	109	106	0.825688	0.830189	24.5	29.5	1.84	2.3	3.54788	2.22815	3.61	1.87	91	96	15.79	9.4	165	157	35.591	46.379	212	207	155	73	3.00546	3.00546	6.68693	2.22222	2.75229	-0.545073	-20.4082	-25	37.1977	48.1994	-5.49451	40.4687	4.84848	-30.311	2.35849
1	38	1.58	74	68.5	29.6427	27.4395	34.6	32.6	95	94	122	119	0.778689	0.789916	24	33.1	1.21	2	2.84	1.82	2.54	1.36	101	88	11.4	8.38	170	130	54.81	55.215	168	156	160	115	7.43243	7.43243	5.78035	1.05263	2.45902	-1.44184	-37.9167	-65.2893	35.9155	46.4567	12.8713	26.4912	23.5294	-0.738916	7.14286
1	27	1.46	89.4	85.7	41.9403	40.2045	36.9	33	94	92	106	103	0.886792	0.893204	24	31	1.61	2.6	1.43244	1.71111	1.14	0.99	105	95	6.6	5.86	195	153	47.472	58.911	196	187	136	94	4.1387	4.1387	10.5691	2.12766	2.83019	-0.722991	-29.1667	-61.4907	-19.4539	13.1579	9.52381	11.2121	21.5385	-24.0963	4.59184
1	39	1.66	69.1	65	25.0762	23.5883	35.2	33.4	98	97	115	112	0.852174	0.866071	26.4	31.8	1.43	2	2.63148	1.75165	2	1	87	79	8.98	10	191	184	49	63	146	155	67	153	5.93343	5.93343	5.11364	1.02041	2.6087	-1.63083	-20.4545	-39.8601	33.4347	50	9.1954	-11.3586	3.66492	-28.5714	-6.16438
1	40	1.59	75.8	68.2	29.983	26.9768	39	34	90	89	117	114	0.769231	0.780702	24	27.6	2.4	3	2.03467	2.13333	1.42	0.44	84	80	10.8	9.81	166	157	56.711	53.731	160	145	87	74	10.0264	10.0264	12.8205	1.11111	2.5641	-1.49123	-15	-25	-4.84928	69.0141	4.7619	9.16667	5.42169	5.25471	9.375
1	29	1.58	66.5	60.4	26.6384	24.1948	36.5	34.6	77	75	102	98	0.754902	0.765306	26.8	31.4	1.35	2.6	3.27807	1.25165	1.14	1.02	90	76	15.2	11	164	151	54.81	59.54	145	168	54	114	9.17293	9.17293	5.20548	2.5974	3.92157	-1.37821	-17.1642	-92.5926	61.8174	10.5263	15.5556	27.6316	7.92683	-8.62981	-15.8621
1	40	1.7	99	87.6	34.2561	30.3114	39.8	36.5	91	87	113	108	0.80531	0.805556	24	29.5	1.62	2.6	1.92521	1.684	4.2	1.53	103	81	8.42	7.57	158	105	32.112	38.163	157	135	179	86	11.5152	11.5152	8.29146	4.3956	4.42478	-0.030525	-22.9167	-60.4938	12.529	63.5714	21.3592	10.095	33.5443	-18.8434	14.0127
1	35	1.59	80.8	78.4	31.9608	31.0114	40	37.5	96	93	113	110	0.849558	0.845455	25	32.4	2.32	3.19	3.79496	3.37486	3	2.21	96	91	15.02	12	166	146	31.1	59.527	205	180	86	94	2.9703	2.9703	6.25	3.125	2.65487	0.482955	-29.6	-37.5	11.0699	26.3333	5.20833	20.1065	12.0482	-91.4051	12.1951
1	34	1.57	76	70.2	30.8329	28.4799	40	37.6	98	97	110	108	0.890909	0.898148	24.2	34.1	1.39	2.5	3.03353	3.76395	2	1	105	94	14.8	11.2	200	143	50.028	37.762	150	141	98	153	7.63158	7.63158	6	1.02041	1.81818	-0.812547	-40.9091	-79.8561	-24.0782	50	10.4762	24.3243	28.5	24.5183	6
1	20	1.58	80	78.7	32.0461	31.5254	40.7	37.6	105	100	114	110	0.921053	0.909091	24.2	29	1.82	2.1	2.50738	2.02143	2	1.4	89	97	11.41	8.3	137	166	35.481	38.417	239	150	212	190	1.625	1.625	7.61671	4.7619	3.50877	1.2987	-19.8347	-15.3846	19.3808	30	-8.98876	27.2568	-21.1679	-8.27485	37.2385
1	30	1.62	66	64	25.15	24.3865	40.3	38.6	105	101	114	109	0.921053	0.926606	24.5	29.3	1.72	2.5	1.57067	2.12138	3.76	1	93	94	9.14	6.84	145	165	26.94	45.24	145	155	81	107	-3.125	3.125	4.21836	3.80952	4.38596	-0.602883	-19.5918	-45.3488	-35.0626	73.4043	-1.07527	25.1641	-13.7931	-67.9287	-6.89655
1	26	1.66	83	80	30.1205	29.0318	42.5	40	80	78	106	103	0.754717	0.757282	25.2	32	1.17	2	2.58	1.6	3.99	1.1	90	92	11.36	7.2	165	158	59.23	67.27	177	125	73	90	3.61446	3.61446	5.88235	2.5	2.83019	-0.339806	-26.9841	-70.9402	37.9845	72.4311	-2.22222	36.6197	4.24242	-13.5742	29.3785
1	37	1.6	100.6	96.3	39.2969	37.6172	43.9	40.2	112	109	125	120	0.896	0.908333	26	35	2.5	3	3.23	2.97	2.1	2.04	104	99	13.2	11.58	149	140	21.68	32	150	168	295	248	4.27435	4.27435	8.42825	2.67857	4	-1.37649	-34.6154	-20	8.04954	2.85714	4.80769	12.2727	6.04027	-47.6015	-12
1	39	1.63	88.3	83	33.2342	31.24	45.4	41.2	116	114	116	114	1	1	24	29.5	1.62	2.7	3.4	2.60578	2	2	108	80	10.66	8.4	244	170	37.289	46.731	195	133	225	170	-6.38554	6.38554	9.2511	1.72414	1.72414	0	-22.9167	-66.6667	23.3595	0	25.9259	21.2008	30.3279	-25.3211	31.7949
2	34	1.59	89.6	87	35.4416	34.4132	30	27	83	80	109	106	0.761468	0.754717	24	31	1.13	2	2.73778	0.891852	2.28	1.13	84	84	13.2	4.3	170	124	45.825	49.123	107	120	62	87	2.90179	2.90179	10	3.61446	2.75229	0.886565	-29.1667	-76.9912	67.4242	50.4386	0	67.4242	27.0588	-7.19694	-12.1495
2	21	1.63	65.7	61	24.7281	22.9591	35	30.1	81	76	110	108	0.736364	0.703704	26.8	26.8	1	2.5	0.999506	0.795062	3.1	2.55	92	92	4.4	3.5	136	154	36	61	168	130	78	78	7.15373	7.15373	14	6.17284	1.81818	4.4353	0	-150	20.4545	17.7419	0	20.4545	-13.2353	-69.4444	22.619
2	20	1.58	68.9	61.3	27.5997	24.5554	34.7	30.5	105	100	120	116	0.875	0.862069	25.3	32	2	2	2	1.162	2	1.02	109	81	11.82	5.81	187	166	53.009	49.894	219	157	188	88	11.0305	11.0305	12.1037	4.7619	3.33333	1.47783	-26.4822	0	41.9	49	25.6881	50.846	11.2299	5.87636	28.3105
2	29	1.55	80.6	75.3	33.5484	31.3424	36.4	32.2	98	92	113	110	0.867257	0.836364	24.9	31	2.23	2.8	2.53867	2.2	1.14	2.18	96	91	10.71	4.8	151	128	38.183	40.429	146	119	73	123	6.57568	6.57568	11.5385	6.12245	2.65487	3.56215	-24.498	-25.5605	13.3403	-91.2281	5.20833	55.1821	15.2318	-5.8822	18.4932
2	33	1.62	65.4	62.2	24.92	23.7007	36.5	33.2	98	93	110	97	0.890909	0.958763	24	31	1.31	2.7	2	1.5	2	1	89	89	14.36	13.75	168	168	49.728	59.268	181	133	131	90	4.89297	4.89297	9.0411	5.10204	11.8182	-7.61624	-29.1667	-106.107	25	50	0	4.24791	0	-19.1844	26.5193
2	38	1.63	75	72	28.2284	27.0993	36	34.2	87	86	113	110	0.769912	0.781818	25	30.8	2	2.5	2.58672	2	3	0.14	98	88	10.69	5.97	174	157	51.444	52.185	141	155	80	64	4	4	5	1.14943	2.65487	-1.5465	-23.2	-25	22.6819	95.3333	10.2041	44.1534	9.77011	-1.4404	-9.92908
2	24	1.73	84.2	80.7	28.1332	26.9638	38.3	35	109	106	127	120	0.858268	0.883333	25	34.1	1.4	1.8	2.6	1.6079	3.6	1.1	100	88	14.94	7.4	145	143	47	58	128	150	99	94	4.15677	4.15677	8.61619	2.75229	5.51181	-2.92049	-36.4	-28.5714	38.1576	69.4444	12	50.4685	1.37931	-23.4043	-17.1875
2	22	1.58	72.6	70.2	29.0819	28.1205	39.5	35.1	85	80	100	96	0.85	0.833333	24	31.4	1.7	2	2.7	2.1	2	1.42	108	91	13.35	9.29	135	127	50.553	52.348	260	170	198	163	3.30579	3.30579	11.1392	5.88235	4	1.96078	-30.8333	-17.6471	22.2222	29	15.7407	30.412	5.92593	-3.55073	34.6154
2	40	1.55	92.3	90	38.4183	37.461	38.1	35.1	116	106	121	115	0.958678	0.921739	24	28.3	2.04	2.6	2.15798	2	1.33	0.68	89	85	9.82	15.47	165	157	45.12	47.8	153	148	121	113	2.49187	2.49187	7.87402	8.62069	4.95868	3.85307	-17.9167	-27.451	7.32053	48.8722	4.49438	-57.5356	4.84848	-5.93972	3.26797
2	25	1.64	77	74	28.6288	27.5134	44	37	100	98	119	115	0.840336	0.852174	25.8	32.3	1	2	2.70365	3.01185	2.66	1.36	106	95	10.33	12.84	176	120	43.52	45.411	184	194	134	148	3.8961	3.8961	15.9091	2	3.36134	-1.4087	-25.1938	-100	-11.3993	48.8722	10.3774	-24.2982	31.8182	-4.34513	-5.43478
2	36	1.57	62.2	58.3	25.2343	23.6521	38.6	37	89	88	108	104	0.824074	0.846154	25	28.3	1.71	2	3.94	2.7	3	2.14	101	99	11.39	16.12	178	164	31.631	35.129	181	144	250	174	6.2701	6.2701	4.14508	1.1236	3.7037	-2.67934	-13.2	-16.9591	31.4721	28.6667	1.9802	-41.5277	7.86517	-11.0588	20.442
2	35	1.68	64.8	62.3	22.9592	22.0734	41.7	39	96	94	117	115	0.820513	0.817391	26.8	34.4	1.67	2.2	3.15025	2.5	4.75	1.19	95	84	13.43	7.2	171	160	26.938	41.555	140	166	107	100	3.85802	3.85802	6.47482	2.08333	1.7094	0.380435	-28.3582	-31.7365	20.6411	74.9474	11.5789	46.3887	6.43275	-54.2616	-18.5714
2	25	1.74	90.4	86	29.8586	28.4053	43.9	40	94	91	126	122	0.746032	0.745902	24.8	27.6	1.89	2.48	3.5398	2.4	1.52	1	86	83	16.67	14.48	172	131	42.581	39.593	164	152	153	130	4.86726	4.86726	8.88383	3.19149	3.1746	0.0174398	-11.2903	-31.2169	32.1996	34.2105	3.48837	13.1374	23.8372	7.01721	7.31707
2	23	1.55	85.2	79.7	35.4631	33.1738	42.7	40	101	95	121	119	0.834711	0.798319	24	30	1.61	2.3	2.92012	2.98133	3	1.02	109	104	10.85	11.61	145	135	42	44.2	225	167	121	100	6.4554	6.4554	6.32319	5.94059	1.65289	4.35976	-25	-42.8571	-2.09614	66	4.58716	-7.00461	6.89655	-5.2381	25.7778
2	40	1.58	85.5	82	34.2493	32.8473	43.8	42	98	97	120	118	0.816667	0.822034	24.5	31.8	1.56	2.7	3.762	2.34681	4.18	2.55	99	93	15.39	10.22	149	132	59.912	63	166	128	75	86	4.09357	4.09357	4.10959	1.02041	1.66667	-0.657212	-29.7959	-73.0769	37.6179	38.9952	6.06061	33.5932	11.4094	-5.15423	22.8916
3	39	1.68	54.1	55	19.1681	19.487	16.7	17	63	64	93	92	0.677419	0.695652	27	28	2.63	2.95	0.618444	0.7	0.8	0.75	69	72	3.63	3.7	121	120	42.261	41.23	145	143	59	61	-1.66359	-1.66359	-1.79641	-1.5873	1.07527	-2.69151	-3.7037	-12.1673	-13.1872	6.25	-4.34783	-1.92837	0.826446	2.4396	1.37931
3	36	1.54	50.9	51	21.4623	21.5045	17	18	73	72	94	93	0.776596	0.774194	24	25.3	2.73	2.77	1.166	1.07	1.76	1.81	81	80	5.83	5.85	134	129	40.055	41.36	134	133	124	123	-0.196464	-0.196464	-5.88235	1.36986	1.06383	0.309324	-5.41667	-1.4652	8.23328	-2.84091	1.23457	-0.343053	3.73134	-3.25802	0.746269
3	38	1.6	53.5	52	20.8984	20.3125	21.8	20	65	66	94	95	0.691489	0.694737	26	27.6	2.95	2.91	1.26667	1.33	2	0.92	75	76	6.84	6.87	98	99	45.646	45.01	142	143	59	60	2.80374	2.80374	8.25688	-1.53846	-1.06383	-0.469636	-6.15385	1.35593	-5	54	-1.33333	-0.438596	-1.02041	1.39333	-0.704225
3	34	1.58	52.6	53.1	21.0703	21.2706	22	21	69	68	95	96	0.726316	0.708333	25	26.8	3.04	2.99	1.09941	1.01	0.79	0.75	82	83	5.43	5.5	102	104	52	52	112	113	58	60	-0.95057	-0.95057	4.54545	1.44928	-1.05263	2.47585	-7.2	1.64474	8.13233	5.06329	-1.21951	-1.28913	-1.96078	0	-0.892857
3	29	1.55	52.3	53	21.769	22.0604	22.9	21	66	67	94	93	0.702128	0.72043	24	25.3	2.61	2.55	1.28704	1.19	0.94	0.92	75	74	6.95	6.92	134	136	50.754	51.12	140	142	82	83	-1.33843	-1.33843	8.29694	-1.51515	1.06383	-2.60671	-5.41667	2.29885	7.53957	2.12766	1.33333	0.431655	-1.49254	-0.721125	-1.42857
3	35	1.53	52	51	22.2137	21.7865	22.4	21	72	73	98	99	0.734694	0.737374	23	24	3.12	2.94	1.68454	1.6	2.24	2.31	82	80	8.32	8.41	128	130	54	54	119	120	50	58	1.92308	1.92308	6.25	-1.38889	-1.02041	-0.364759	-4.34783	5.76923	5.01876	-3.125	2.43902	-1.08173	-1.5625	0	-0.840336
3	38	1.59	55	54.99	21.7555	21.7515	21.6	22	69	68	91	90	0.758242	0.755556	27	26	2.36	2.39	1.00958	1.03	1	2.59	76	77	5.38	5.4	100	101	55.939	56.31	161	164	86	87	0.0181818	0.0181818	-1.85185	1.44928	1.0989	0.354267	3.7037	-1.27119	-2.0226	-159	-1.31579	-0.371747	-1	-0.663222	-1.86335
3	36	1.69	56.4	57	19.7472	19.9573	24	23	69	68	94	95	0.734043	0.715789	23	24.2	3.72	3.59	1.63393	1.65	1.23	1.28	82	84	8.07	8.01	136	135	58.871	55.65	140	141	79	74	-1.06383	-1.06383	4.16667	1.44928	-1.06383	2.48665	-5.21739	3.49462	-0.98377	-4.06504	-2.43902	0.743494	0.735294	5.47128	-0.714286
3	38	1.64	56.1	55	20.8581	20.4491	22.8	23	68	69	99	99	0.686869	0.69697	25	24.4	2.9	3.05	1.82807	1.72	0.43	0.47	87	86	8.51	8.62	112	117	53	52	117	115	51	53	1.96078	1.96078	-0.877193	-1.47059	0	-1.47059	2.4	-5.17241	5.91191	-9.30233	1.14943	-1.2926	-4.46429	1.88679	1.7094
3	33	1.61	58.4	59	22.53	22.7615	22.7	23	69	68	100	99	0.69	0.686869	27	26	2.86	2.88	2.13837	2.03	1.34	1.39	84	85	10.31	10.33	122	121	49.142	48.1	138	145	67	72	-1.0274	-1.0274	-1.32159	1.44928	1	0.453813	3.7037	-0.699301	5.0679	-3.73134	-1.19048	-0.193986	0.819672	2.12039	-5.07246
3	24	1.6	58.7	57	22.9297	22.2656	24.6	23	73	72	102	103	0.715686	0.699029	29	28.3	3.39	3.3	1.03333	1.01	0.18	0.23	75	73	5.58	5.61	134	137	51.115	50.21	144	143	55	57	2.89608	2.89608	6.50407	1.36986	-0.980392	2.32744	2.41379	2.65487	2.25806	-27.7778	2.66667	-0.537634	-2.23881	1.77052	0.694444
3	33	1.55	53.5	52	22.2685	21.6441	24.7	25	70	69	93	92	0.752688	0.75	23	25.7	2.27	2.21	2.28346	2.15	0.8	0.83	85	86	10.88	10.9	98	99	50.235	52.36	130	135	108	106	2.80374	2.80374	-1.21457	1.42857	1.07527	0.357143	-11.7391	2.64317	5.84451	-3.75	-1.17647	-0.183824	-1.02041	-4.23012	-3.84615
3	34	1.54	55.2	56.1	23.2754	23.6549	27.9	26	73	74	97	98	0.752577	0.755102	27	28.3	3.7	3.62	1.27353	1.3	0.8	0.88	74	73	6.97	6.88	115	118	52.87	56.01	130	130	60	63	-1.63043	-1.63043	6.81004	-1.36986	-1.03093	-0.335477	-4.81481	2.16216	-2.07841	-10	1.35135	1.29125	-2.6087	-5.9391	0
3	29	1.6	53	52.5	20.7031	20.5078	28.7	29	70	71	101	102	0.693069	0.696078	27	26.8	3.08	3.18	1.67388	1.75	1	0.6	76	77	8.92	8.87	124	122	69.963	69.01	155	153	77	78	0.943396	0.943396	-1.0453	-1.42857	-0.990099	-0.434174	0.740741	-3.24675	-4.54773	40	-1.31579	0.560538	1.6129	1.36215	1.29032
3	37	1.67	56.1	55.6	20.1155	19.9362	28.3	29	63	62	100	99	0.63	0.626263	26	27.7	3.4	3.42	1.28714	1.33	1	1	77	78	6.77	6.8	137	139	55.244	52.36	139	142	74	73	0.891266	0.891266	-2.4735	1.5873	1	0.593234	-6.53846	-0.588235	-3.3302	0	-1.2987	-0.443131	-1.45985	5.22048	-2.15827
[truncated: 1 more columns]
